# Supplementary material for: Village dogs match pet dogs in reading human facial expressions
Source: PeerJ. 2023 Jul 6;11:e15601. doi: 10.7717/peerj.15601 (PMC10329818; doi:10.7717/peerj.15601)
Supplement: Supplemental Information 2 [file peerj-11-15601-s002.xlsx]

## Sheet: Data
Subject	body_condition(n_normal;t_thin)	experimenter	group	condition	sex	Proximity(sec)	Looking(sec)	Wagging(sec)	Test_Duration(sec)	Avert_gaze(yes_1;no_0)	Eat_all(yes_1;no_0)
PdA1	n	RD	Pet dogs dog-area	neutral	f	111.2	52.4	15.8	127.8	0	1
PdA2	n	JS	Pet dogs dog-area	angry	m	81.2	26	0	400.6	2	0
PdA3	n	ML	Pet dogs dog-area	happy	f	43.2	18.6	74	194.4	0	1
PdA4	n	JS	Pet dogs dog-area	neutral	m	114	84.6	64.4	115.6	0	1
PdA5	n	ML	Pet dogs dog-area	angry	m	112.2	55.8	119	125.8	0	1
PdA6	n	ML	Pet dogs dog-area	neutral	f	127.8	25.2	0	145.4	0	1
PdA7	n	JS	Pet dogs dog-area	neutral	f	155.6	45.4	54.8	209.2	2	1
PdA8	n	JS	Pet dogs dog-area	neutral	m	66	34.2	138.2	167.2	0	1
PdA9	n	JS	Pet dogs dog-area	happy	m	169.6	37	7.2	212.6	1	1
PdA10	n	RD	Pet dogs dog-area	happy	m	115.8	34	11.4	135	0	1
PdA11	n	JS	Pet dogs dog-area	angry	m	139.4	40.4	0	184	0	1
PdA12	n	JS	Pet dogs dog-area	neutral	f	149.6	59.6	69.6	168.8	1	1
PdA13	n	JS	Pet dogs dog-area	happy	f	117.8	34.8	27.6	207.6	0	1
PdA14	n	JS	Pet dogs dog-area	angry	f	132.2	28.6	7	145.6	5	1
PdA15	n	RD	Pet dogs dog-area	neutral	f	98.6	24.8	26.6	122.8	0	1
PdA16	n	JS	Pet dogs dog-area	angry	m	113.6	16.4	0	224.6	0	1
PdA17	n	ML	Pet dogs dog-area	angry	m	109.6	20.4	0	200.2	0	0
PdA18	n	ML	Pet dogs dog-area	neutral	f	125	9	0	162.2	0	1
PdA19	n	JS	Pet dogs dog-area	neutral	f	200.8	39.8	17.6	284.2	0	1
PdA20	n	JS	Pet dogs dog-area	neutral	f	107.8	41.4	45.6	155.4	0	1
PdA21	n	RD	Pet dogs dog-area	happy	f	141.4	44.8	28.4	171	0	1
PdA22	n	JS	Pet dogs dog-area	neutral	f	76.4	29	2	138.8	3	1
PdA23	n	JS	Pet dogs dog-area	happy	m	147.8	40.2	23.2	186.6	0	1
PdA24	n	JS	Pet dogs dog-area	happy	m	133	52.4	20.8	150.2	1	1
PdA25	n	JS	Pet dogs dog-area	angry	m	199.6	32.8	4.4	199.6	0	1
PdA26	n	JS	Pet dogs dog-area	happy	f	143.6	31	91.4	193	2	1
PdA27	n	ML	Pet dogs dog-area	happy	m	61.8	13.4	9.8	141.6	0	1
PdA28	n	JS	Pet dogs dog-area	angry	f	138.8	75.8	21.8	146.6	1	0
PdA29	n	JS	Pet dogs dog-area	happy	f	141.4	61.2	126.6	141.6	0	1
PdA30	n	JS	Pet dogs dog-area	happy	f	112.2	27.8	41.2	170.6	0	1
PdA31	n	ML	Pet dogs dog-area	neutral	f	131.8	44	51.6	153.8	2	1
PdA32	n	RD	Pet dogs dog-area	angry	m	120.8	43.4	0	138.4	1	1
PdA33	n	ML	Pet dogs dog-area	neutral	f	98.4	19.6	0.8	159.8	0	1
PdA34	n	RD	Pet dogs dog-area	happy	f	100.8	39.2	31.6	124.2	0	1
PdA35	n	JS	Pet dogs dog-area	neutral	m	161.4	91	75.4	169	3	1
PdA36	n	RD	Pet dogs dog-area	angry	m	150	54.4	28.8	150	0	1
PdA37	n	JS	Pet dogs dog-area	happy	m	185.8	88.6	128.8	197	0	1
PdA38	n	ML	Pet dogs dog-area	angry	f	140.8	44.4	3.6	140.8	1	0
PdA39	n	JS	Pet dogs dog-area	happy	m	101.4	33.6	0	135.6	0	1
PdA40	n	JS	Pet dogs dog-area	happy	f	208.2	63	0.8	208.2	0	1
PdA41	n	ML	Pet dogs dog-area	happy	f	150	54.4	28.8	150	3	1
PdA42	n	JS	Pet dogs dog-area	happy	f	92.6	44.6	1.2	165.2	0	1
PdA43	n	RD	Pet dogs dog-area	happy	f	142.6	28	18	200	0	1
PdA44	n	JS	Pet dogs dog-area	angry	f	58.6	17	17.2	141.8	0	1
PdA45	n	RD	Pet dogs dog-area	angry	m	122.6	29	48.6	158	0	0
PdA46	n	JS	Pet dogs dog-area	neutral	f	227.2	17.6	5.2	400	3	0
PdA47	n	RD	Pet dogs dog-area	angry	f	111.6	21.4	30.2	150.6	2	1
PdA48	n	ML	Pet dogs dog-area	angry	m	98.8	9.4	0.6	154.4	0	1
PdA49	n	JS	Pet dogs dog-area	angry	m	159	38.8	65.8	224.6	0	0
PdA50	n	JS	Pet dogs dog-area	angry	m	165.4	54.4	52.4	330.8	1	1
PdA51	n	JS	Pet dogs dog-area	neutral	m	118.2	41.2	70.6	143.8	0	1
PdA52	n	JS	Pet dogs dog-area	neutral	m	147.4	40.2	36	228.8	2	1
PdA53	n	JS	Pet dogs dog-area	angry	m	40.8	25.4	5	167.4	3	0
PdA54	n	JS	Pet dogs dog-area	happy	m	169.4	53.4	72.4	169.4	3	1
PdA55	n	ML	Pet dogs dog-area	happy	m	46.2	52	19.8	144.2	0	0
PdA56	n	RD	Pet dogs dog-area	neutral	m	134.8	76.2	2	134.8	0	1
PdA57	n	JS	Pet dogs dog-area	angry	m	206.6	71.6	0	267.6	0	1
PdA58	n	JS	Pet dogs dog-area	neutral	m	36	0	18	214.8	0	1
PdA59	n	JS	Pet dogs dog-area	angry	f	203.6	60.4	3	223.6	0	1
PdA60	n	JS	Pet dogs dog-area	happy	m	56.4	16.6	12	555.6	0	0
PdA61	n	RD	Pet dogs dog-area	neutral	f	21.2	1.4	0	60.2	0	0
PdA62	n	JS	Pet dogs dog-area	neutral	f	138.8	34	16.6	175.4	0	1
PdA63	n	JS	Pet dogs dog-area	angry	f	187.2	30	34.2	200.6	0	1
PdG1	n	JS	Pet dogs garden	angry	f	109.4	63.6	21.2	146.6	0	1
PdG2	n	JS	Pet dogs garden	neutral	m	87	20.2	22.8	152.4	7	0
PdG3	n	JS	Pet dogs garden	neutral	m	152.2	47	8.6	161.4	0	1
PdG4	n	JS	Pet dogs garden	neutral	f	41.6	83.8	25.8	201	0	1
PdG5	n	JS	Pet dogs garden	neutral	m	50	34.2	33.2	155.8	0	0
PdG6	n	RD	Pet dogs garden	happy	f	151.6	42.6	0	156.8	8	1
PdG7	n	JS	Pet dogs garden	angry	m	93.4	18.8	2.2	136.6	6	1
PdG8	n	JS	Pet dogs garden	neutral	m	147	82	16.6	147	4	0
PdG9	n	JS	Pet dogs garden	neutral	m	144.2	68.8	11.2	163.6	1	0
PdG10	n	JS	Pet dogs garden	happy	f	145.4	56.8	71.6	172	1	1
PdG11	n	JS	Pet dogs garden	happy	m	126.2	33	8.2	174.4	6	0
PdG12	n	RD	Pet dogs garden	happy	m	104.6	15.4	47	214	0	1
PdG13	n	JS	Pet dogs garden	neutral	m	115	61	0	231.8	0	1
PdG14	n	JS	Pet dogs garden	angry	f	88.6	72.6	59.2	138.4	0	1
PdG15	n	RD	Pet dogs garden	happy	f	158.6	111.2	11.4	158.6	0	1
PdG16	n	JS	Pet dogs garden	angry	f	131.4	74.8	4.4	131.4	6	0
PdG17	n	JS	Pet dogs garden	angry	f	17.4	38.4	10.4	147.2	0	0
PdG18	n	RD	Pet dogs garden	neutral	m	107.8	57.2	0	151.8	0	0
PdG19	n	JS	Pet dogs garden	neutral	f	159.8	27.6	21.4	205.4	2	1
PdG20	n	JS	Pet dogs garden	neutral	f	61.4	55	0	151.2	2	0
PdG21	n	RD	Pet dogs garden	angry	f	218.8	48.2	22	243.4	1	1
PdG22	n	RD	Pet dogs garden	angry	f	140.2	24.2	30.4	142.4	0	1
PdG23	n	JS	Pet dogs garden	angry	f	147.6	39.2	0	147.6	0	1
PdG24	n	JS	Pet dogs garden	angry	f	49.8	49.4	50	212.2	1	1
PdG25	n	JS	Pet dogs garden	happy	m	151	64.4	72.2	166	0	1
PdG26	n	JS	Pet dogs garden	angry	f	16.8	34.8	2	181.4	4	1
PdG27	n	JS	Pet dogs garden	happy	m	142.8	57	110.4	171	2	1
PdG28	n	RD	Pet dogs garden	happy	f	97.4	27.4	31.6	176.8	2	1
PdG29	n	JS	Pet dogs garden	angry	f	97.4	24.8	33.8	154.8	2	1
PdG30	n	JS	Pet dogs garden	angry	f	130.4	71.4	33.4	161	0	1
PdG31	n	RD	Pet dogs garden	angry	f	85.4	70.4	1.2	187.8	8	1
PdG32	n	JS	Pet dogs garden	angry	f	147.2	55.8	83.6	163.8	2	1
PdG33	n	JS	Pet dogs garden	neutral	f	59.8	45	11.8	193.8	1	0
PdG34	n	JS	Pet dogs garden	happy	m	178.2	94.6	45.2	178.2	3	1
PdG35	n	JS	Pet dogs garden	neutral	f	87.4	55.8	2	202.2	1	1
PdG36	n	JS	Pet dogs garden	happy	f	27.6	35.8	1.8	123.4	0	1
PdG37	n	JS	Pet dogs garden	happy	f	155.8	113.6	0	155.8	1	1
PdG38	n	RD	Pet dogs garden	neutral	f	29	36.8	1	127.6	0	0
PdG39	n	RD	Pet dogs garden	neutral	f	70.8	25.2	20	169.8	3	1
PdG40	n	JS	Pet dogs garden	happy	m	143	54	7.2	154	0	1
PdG41	n	JS	Pet dogs garden	happy	m	195.2	46	0	202.6	3	1
PdG42	n	JS	Pet dogs garden	neutral	f	65.4	34.4	24.4	186.6	0	1
PdG43	n	JS	Pet dogs garden	neutral	f	131.6	82	63.4	131.6	0	1
PdG44	n	JS	Pet dogs garden	happy	m	71.8	92.6	38.6	145.8	0	0
PdG45	n	JS	Pet dogs garden	angry	f	98.8	68	4.2	278.2	3	1
PdG46	n	JS	Pet dogs garden	neutral	m	155.8	75.8	1.2	155.8	0	1
PdG47	n	JS	Pet dogs garden	angry	m	163.4	109.8	110.6	187.6	1	1
PdG48	n	JS	Pet dogs garden	happy	f	113.2	19.4	3.2	244.2	1	0
PdG49	n	JS	Pet dogs garden	happy	f	160.8	84	0	160.8	0	0
PdG50	n	JS	Pet dogs garden	happy	m	193	61.2	0	193	0	1
PdG51	n	JS	Pet dogs garden	happy	m	121.2	66.2	10.2	137.6	0	0
PdG52	n	JS	Pet dogs garden	angry	f	183.8	65	44.2	191.6	0	1
PdG53	n	JS	Pet dogs garden	angry	f	143.2	77.4	7	200.8	2	1
Aghroud1	n	JG	Village dogs	angry	m	86.4	40	16.4	119.6	1	1
Aghroud2	n	JG	Village dogs	happy	f	85.6	69.4	67	104.2	0	1
AitBihi1	t	JG	Village dogs	happy	f	40.8	21	57.6	99.2	0	0
AitBihi2	n	RD	Village dogs	angry	m	44.8	18.2	32.4	100.6	3	1
AitBihi3	t	RD	Village dogs	neutral	m	39.2	21.6	45.2	112.2	2	1
AitBihi4	n	RD	Village dogs	happy	f	68.2	19.6	50.4	123.8	0	0
Andy	t	LB	Village dogs	happy	m	86.8	16.6	31	119.8	0	1
Aourir1	n	LB	Village dogs	neutral	f	0	4	12.4	109.6	0	0
Banana1	n	RD	Village dogs	neutral	m	39	16	16.6	61.6	0	0
Banner	t	LB	Village dogs	happy	m	75.4	28.2	0	142	0	1
Bella	n	LB	Village dogs	angry	f	25.4	26.6	2.4	125.6	4	0
Booboo	n	RD	Village dogs	neutral	m	99	86	77.4	119.2	1	0
Cammie	n	LB	Village dogs	neutral	f	25.8	12.2	15.8	88.4	1	0
Chase	n	RD	Village dogs	angry	f	55	23.8	44.4	113.4	2	1
Cow259	t	LB	Village dogs	happy	f	60.8	76.2	69.6	127.4	0	0
Cowboy	n	JG	Village dogs	happy	m	2.8	23.8	31.2	127	0	0
Dingo	n	RD	Village dogs	happy	m	30.6	27.8	17	95.4	0	1
Dobby	n	RD	Village dogs	angry	f	10	46	1.6	92.6	0	0
FakeFreckles	n	RD	Village dogs	happy	m	38.2	34	10	102.4	0	0
Fennec	n	JG	Village dogs	angry	f	50.8	32	25.6	75	0	1
Giorgia	n	LB	Village dogs	happy	f	30	27.2	61.2	109	0	0
Happy	n	LB	Village dogs	happy	f	2.4	27.8	13	108.2	0	1
Ifraden1	n	LB	Village dogs	neutral	f	0	48.8	3.2	101.6	2	0
Ifraden2	t	JG	Village dogs	angry	f	107.4	46	35.2	117.8	2	1
Ifraden3	n	RD	Village dogs	happy	m	72.2	25.2	2.8	129.2	3	1
Ifraden4	t	RD	Village dogs	neutral	m	70.4	27.6	9.8	118.4	2	1
Ifraden5	t	RD	Village dogs	angry	f	63.6	39	23.6	108.8	5	0
ImiOuaddar1	n	LB	Village dogs	neutral	f	102.4	59.8	23	104.4	2	0
ImiOuaddar2	n	RD	Village dogs	neutral	m	114.4	80.4	72.2	114.4	2	0
ImiOuaddar4	n	RD	Village dogs	angry	f	68.8	52.8	112.4	123.8	2	1
ImiOuaddar5	n	JG	Village dogs	neutral	m	66	50.2	85.4	92.8	1	0
ImiOuaddar7	t	LB	Village dogs	angry	m	110.4	55	62.4	110.4	8	0
Karim	n	JG	Village dogs	neutral	m	15.2	33	6.8	93.6	2	1
Km25	n	LB	Village dogs	happy	f	66.4	41.6	75.4	112.2	3	0
Laroche	n	LB	Village dogs	angry	f	32	12.2	16.4	35.8	4	0
Mago	n	RD	Village dogs	angry	m	0	26.8	28.2	105.8	3	1
Mars	t	JG	Village dogs	neutral	m	46.6	49.2	39.2	107	0	0
Mulan	n	JG	Village dogs	neutral	f	91.6	63.6	84.6	130.8	5	1
Mummy	t	RD	Village dogs	angry	f	64.2	46	67.6	112	3	0
Musica	n	LB	Village dogs	angry	f	51.2	34.8	6.2	121.8	4	0
Notte	n	LB	Village dogs	neutral	f	40.6	17.2	0.8	103	4	0
Panini	n	RD	Village dogs	neutral	f	57	42	1.4	119.8	0	1
Panpan	n	LB	Village dogs	angry	f	42.6	31	35.4	78	1	0
Pepperoni	n	JG	Village dogs	neutral	f	0	18.8	19	77.2	1	0
Pinkie	n	JG	Village dogs	happy	f	45.2	28	54.2	106.4	2	0
Pixie	t	JG	Village dogs	neutral	f	67.4	35.4	29.4	112.4	0	0
Pizza	t	LB	Village dogs	happy	f	95.6	48.8	60.8	96.4	0	1
Poopa	n	LB	Village dogs	angry	f	42.8	23.4	68	100.6	0	1
Pumpkin	n	JG	Village dogs	angry	f	49.2	23.6	24.2	109.8	2	1
Ranger	n	JG	Village dogs	angry	m	53.8	27.8	34.8	88.2	4	1
Rumbo	n	JG	Village dogs	happy	m	0	0	0	121	0	0
Scruffy	n	RD	Village dogs	angry	f	53.4	43.2	36.6	114.6	0	0
Sonya	n	LB	Village dogs	angry	f	55.2	38.6	60	113	3	0
Surfshop	n	RD	Village dogs	neutral	f	35	17.2	29.8	155.8	0	0
Tabea	n	RD	Village dogs	happy	f	30.4	19	24	120.2	0	0
Tachdirt1	t	JG	Village dogs	happy	m	87.8	40.6	86.2	126.8	0	1
Tajine	n	LB	Village dogs	neutral	m	30.8	51.8	32.2	97	0	1
Tamraght1	t	LB	Village dogs	happy	f	122.8	33	20.4	170.4	0	0
Tamraght2	n	LB	Village dogs	neutral	f	39.8	19.4	48.6	100.2	3	0
Tamraght3	n	JG	Village dogs	neutral	f	42	23.2	80.2	102.8	1	0
Tamraght4	n	RD	Village dogs	neutral	m	0	22.6	7.8	134	0	0
Tamraght5	n	RD	Village dogs	happy	m	0	24.4	0	110.8	2	0
Tiramisu	n	LB	Village dogs	angry	f	37.2	36.2	41.4	90	1	1
Tonto	n	LB	Village dogs	angry	m	62.6	29.4	51.6	105.2	2	0
Trickster	n	LB	Village dogs	neutral	f	83.8	29.8	54.2	110.8	0	0
Tricycle	t	LB	Village dogs	happy	f	0	37.4	21	125.6	0	1
Twentyfour	n	RD	Village dogs	angry	m	107.4	57.2	95.2	108.6	1	0
Ugo	n	LB	Village dogs	neutral	m	99.6	38.8	94.4	112.4	1	0
Ultima	n	JG	Village dogs	neutral	f	71.4	37.2	40.2	108.8	0	0
Whitey	n	RD	Village dogs	angry	m	0	28.8	0	105.2	3	1
Willy	n	JG	Village dogs	happy	m	19.6	10.6	0	100.2	2	0
Yogi	n	RD	Village dogs	happy	m	39.6	29.8	36	109.8	2	0
